# Supplementary material for: Challenges and opportunities for online education of veterinary sciences in Kazakhstan
Source: Frontiers journal article supplement (doi:10.3389/fcomp.2023.1292515), 2024-01-15
Supplement: Table_2.XLSX [file Table_2.XLSX]

## Sheet: Sheet1
Data that may compromise confidentiality were replaced with NA below to de-identify responses
Section A: Information about the college
1) Name of the faculty and University:	NA	NA	NA	NA	NA	NA	NA	NA
2) Location (city):	NA	NA	NA	NA	NA	NA	NA	NA
3) Region in which the faculty is located:	NA	NA	NA	NA	NA	NA	NA	NA
4) Name of the final degree conferred:	Veterinary Medicine specialist	Veterinary Medicine specialist	Veterinary Sanitation Specialist	Veterinary Specialist	Specialist of Veterinary Medicine	Specialist of Veterinary Medicine and Veterinary sanitation	Veterinarian	Veterinarian
5) Number of years needed to obtain the degree (according to the faculty program):	5	5	5	5	5	5	5	5
6) Year in which the program was established:	2003	2008	2010	2018-2023	2018-2023	From 1952, used educational programs from 2019	2003
7) Number of graduate students per year:	90-100	20	10-50	380	250	163	60-70	90-110
8) Is it a private or public University?:	Quasi-public	Quasi-public	Private	Public (national)	Quasi-public	Quasi-public	Private	Quasi-public
9) Name and position of the individual providing the answers	NA	NA	NA	NA	NA	NA	NA	NA
Section B: History
Number of courses/programs	5		1		8	2	5	5
Audience (students or veterinarians?)	Students and veterinarians		students		students	students and veterinarians	students	teachers
Discipline or area	Pedagogics and veterinary		Genetic Engineering		Veterinary Medicine and Food Safety	Intensive Reproduction Technologies (Artificial Insemination), Veterinary and Sanitary Examination	Veterinary medicine	Pedagogics, veterinary
Number of students	450		15		250	50	> 200	100-200
Platform used	ZOOM, Microsoft Team		Moodle		Flipped classroom	ZOOM	ZOOM	ZOOM, Microsoft Team
Language in which the training was done	Kazakh, Russian, English		English, Russian		Kazakh, Russian	Kazakh, Russian	Kazakh, Russian	Kazakh, Russian
Section C: Questionnaire	1: Strongly disagree; 2: Disagree; 3: Neither agree nor disagree; 4: Agree; 5: Strongly agree
1. Students are ready and motivated to learn online.	4	5	3	4	4	5	4	5
2. Students will be sufficiently motivated and will have sufficient technical skills to take advantage of online learning.	4	4	4	4	4	5	2	4
3. Students do not have internet network and connectivity and speed issues.	3	4	4	4	3	4	2	3
4. My institution will be able to provide adequate professional training for online teaching for students and instructors.	5	5	5	4	4	5	5	5
5. My institution will be able to provide technical and multimedia support, including support for troubleshooting and counseling sessions for students and instructors	5	5	5	4	4	5	5	5
6. Instructors will be as comfortable teaching online as offline.	4	5	5	5	5	5	4	5
7. Instructors will be interested in online teaching and will be well prepared for on line teaching	4	5	4	5	5	5	5	5
8. Instructors will have, or will be able to prepare, multimedia tools (Videos, PPT, Animation) for online teaching.	4	5	4	5	5	5	5	5
9. Network connection are stable and have adequate speed in my city/region	4	5	5	4	4	5	4	4
10. Students and instructors have access to devices (mobile/laptop) suitable for online teaching.	5	5	5	5	4	5	3	5
